# Supplementary material for: Cross-genus phage design through branching domain and conserved peptide interactions
Source: Research Square preprint supplement (doi:10.21203/rs.3.rs-8669920/v1), 2026-02-04
Supplement: Supplementary file 1 [file e059347302332542fd061033.xlsx]

## Sheet: Table S1
Table S1. Primers used for tiles creation to assamble RBPs gene cluster of engineered phages (ePs), together with tile sequence. In the primers to the sequence of interest following features were added: SapI recognition site (NNN GCTCTTC N); overhangs to insert sequence into pVTE entry vector for tiles creation (AGA or CTT); BsaI recognition site (GGTCTC); six-nucleotide-long position marker (PM)…
Tile name	Tile explanation	Primer FOR name	Primer FOR sequence	Primer REV name	Primer REV sequence	Total tile sequence
Start_P1P2_KP32	KP32 bp 33238-33422 (before gp37)	Start_P1P2_KP32_FOR	ATA GCTCTTCC AGA GGTCTC TGACTG GCACCTAATAAGCCGACTGAGCGTG	Start_P1P2_KP32_REV	ATA GCTCTTCC CTT GGTCTC CATGGT GACCTCCTTAAGTTGAATAGGAG	AGAGGTCTCTGACTGGCCTGATGAACTCCACAAAGGAGCTTGTGCCAAACGACCCGCTTACCCAACAGCTAATCATGAAAATCTATGAAGCTAATGGTGTCACCATAAAGCAGCAGCCTAGACCCAACTAATTAGGGCACACTATAGGGAGGCCGACTGGTTTCCCTCCTATTCAACTTAAGGAGGTCACCATGGAGACCAAG
Start_P1P2_K1F	K1F bp 32482-32660 (before gp17), BsaI recognition site mutated	ordered as synthetic fragment	ordered as synthetic fragment	ordered as synthetic fragment	ordered as synthetic fragment	AGAGGTCTCTGACTGCATGACCGGGATGTATAATACGTTCCGTGAACTGGTTCCGAACGACCCCATTACCCAGAAGCTGTTGCTTGGAATGTTTGAGGAGCAAGGCATCCACATCAAGGACTAAACTATCACTATAGGAAACGGGAGGCGCTACCATAGGTATCCGCTTAAATCACAAAGGAGGCACCATGGAGACCAAG
Start_Anchor_P1P3_1	KP32_start(bp 33238-33422)_KP32gp37A_1/178	Start_Anchor_P1P3_1_FOR	ATA GCTCTTCC AGA GGTCTC TGACTG GCACCTAATAAGCCGACTGAGCGTG	Start_Anchor_P1P3_1_REV	ATA GCTCTTCC CTT GGTCTC TGAACC AAACTCCTCGATGTAATCCCCG	AGAGGTCTCTGACTGGCCTGATGAACTCCACAAAGGAGCTTGTGCCAAACGACCCGCTTACCCAACAGCTAATCATGAAAATCTATGAAGCTAATGGTGTCACCATAAAGCAGCAGCCTAGACCCAACTAATTAGGGCACACTATAGGGAGGCCGACTGGTTTCCCTCCTATTCAACTTAAGGAGGTCACCATGGACCAAGATATTAAAACAATCATTCAGTACCCAACAGGAGCCACTGAGTTTGACATCCCGTTTGACTACCTGTCCCGCAAGTTTGTCCGCGTGTCTCTGGTATCGGACGACAACCGCCGACTCTTGCGCAACATCACGGAGTACCGTTACGTGTCGAAGACTCGCGTTAAGATTCTGGTGGACACCACTGGGTTCGACCGAGTTG…
Anchor_P2P3_15	K1Fgp17A_1/146, BsaI recognition site mutated	Anchor_P2P3_15_FOR	ATA GCTCTTCA AGA GGTCTC ACCATG TCCACGATTACACAATTCCCTTC	Anchor_P2P3_15_REV	ATA GCCTTCA CTT GGTCTC TGAACC AGCTGCCCTGATACTCTCAGCGATT C	AGAGGTCTCACCATGTCTCACAGTTCAAGAACCTCAAGTCTCCCCATAGGCCCTCTTTAAGTCCAGACCAAAGGCCCTACCCCAGTCTATCATAAGGTTGGACCGATGGTCAAGACGTCAGGTCAACGATAGGTCTAGGCTATGGCTTAGGGAAGGACGATGGTTCAGAGACCAAG
Anchor_P2P3_16	K1Fgp17A_1/245, BsaI recognition site mutated	Anchor_P2P3_16_FOR	ATA GCTCTTCA AGA GGTCTC ACCATG TCCACGATTACACAATTCCCTTC	Anchor_P2P3_16_REV	ATA GCTCTTCA CTT GGTCTC TGAACC ACCCCAACCACGAGCATCTTTTTCATC	AGAGGTCTCACCATGTCCACGATTACACAATTCCCTTCAGGAAACACTCAGTACAGGATTGAGTTCGACTACCTAGCCAGAACGTTTGTTGTTGTTACGCTGGTGAATAGCTCTAACCCTACCCTGAACCGTGTACTGGAAGTTGGTCGAGATTACCGATTCCTTAACCCAACGATGATTGAGATGTTGGTGGACCAATCAGGTTTCGACATCGTTCGTATTCACCGTCAGACTGGGACTGACTTAGTGGTAGACTTCAGGAATGGCTCAGTGTTGACAGCTAGTGACCTGACCACTGCAGAGCTTCAGGCTATCCATATTGCAGAAGAAGGTCGTGACCAAACGGTTGACTTAGCGAAGGAATATGCCGATGCTGCTGGTAGCTCTGCTGGCAACGCT…
Anchor_P2P4_2	KP32gp37A_1/256	Anchor_P2P4_2_FOR	GTG GCTCTTCC AGA GGTCTC ACCATG GACCAAGATATTAAAACAATCATTCAGTAC	Anchor_P2P4_2_REV	ATA GCTCTTCC CTT GGTCTC TTCAGA GGTAAGCATTACAACAAAGTCG	AGAGGTCTCACCATGGACCAAGATATTAAAACAATCATTCAGTACCCAACAGGAGCCACTGAGTTTGACATCCCGTTTGACTACCTGTCCCGCAAGTTTGTCCGCGTGTCTCTGGTATCGGACGACAACCGCCGACTCTTGCGCAACATCACGGAGTACCGTTACGTGTCGAAGACTCGCGTTAAGATTCTGGTGGACACCACTGGGTTCGACCGAGTTGAAATCCGACGGTTCACCTCAGCGTCTGAACGTGTTGTGGACTTCAGTGATGGCTCTGTGCTCCGCGCTAACGACCTAAACGTGTCCCAGCTACAGTCTTCACATATTGCCGAAGAGGCCCGTGACAGTGCGCTTCTGGCCATGCCTGAGGATGATGCTGGTAACCTCGACGCGAGAAAC…
RBP_P2P5_1	K11gp17ABE_1/875, BsaI recognition site mutated	RBP_P2P5_1_FOR	GTG GCTCTTCC AGA GGTCTC ACCATG GACCAAGACATTAAAACAGTCATTCAG	RBP_P2P5_1_REV	ATA GCTCTTCC CTT GGTCTC TGAACC AAAGTTCTCGATGTAATCCTG	AGAGGTCTCACCATGGACCAAGACATTAAAACAGTCATTCAGTACCCAGTAGGGGCCACTGAGTTCGACATCCCGTTCGACTACCTGTCCCGTAAGTTTGTCCGTGTGTCGCTGGCAGCTGACGACAACCGCAGACTGCTGAGTAACATCACTGAGTACCGCTACGTGTCTAAGACCAGAGTGAAGCTCCTTGTGGAAACTACCGGGTTCGACCGTGTGGAAATCCGCAGATTCACCTCAGCGTCTGAGCGTATTGTTGACTTCAGCGACGGCTCCGTACTGCGGGCAACAGACCTTAACGTTTCTCAGATTCAGTCTGCCCATATCGCAGAGGAAGCACGTGATTCAGCACTGTTGGCTATGCCGCAGGATGATGCTGGCAACCTTGATGCCCGTAAC…
RBP_P2P5_2	KP32gp37ABE_1/869	RBP_P2P5_2_FOR	GTG GCTCTTCC AGA GGTCTC ACCATG GACCAAGATATTAAAACAATCATTCAGTAC	RBP_P2P5_2_REV	ATA GCTCTTCC CTT GGTCTC TTCTCC TTATTTGTAGGTCAGGCCGAG	AGA GGTCTC ACCATG GACCAAGATATTAAAACAATCATTCAGTACCCAACAGGAGCCACTGAGTTTGACATCCCGTTTGACTACCTGTCCCGCAAGTTTGTCCGCGTGTCTCTGGTATCGGACGACAACCGCCGACTCTTGCGCAACATCACGGAGTACCGTTACGTGTCGAAGACTCGCGTTAAGATTCTGGTGGACACCACTGGGTTCGACCGAGTTGAAATCCGACGGTTCACCTCAGCGTCTGAACGTGTTGTGGACTTCAGTGATGGCTCTGTGCTCCGCGCTAACGACCTAAACGTGTCCCAGCTACAGTCTTCACATATTGCCGAAGAGGCCCGTGACAGTGCGCTTCTGGCCATGCCTGAGGATGATGCTGGTAACCTCGACGCGAGA…
Anchor_P2P5_3	KP32gp37A_1/178	Anchor_P2P5_3_FOR	GTG GCTCTTCC AGA GGTCTC ACCATG GACCAAGATATTAAAACAATCATTCAGTAC	Anchor_P2P5_3_REV	ATA GCTCTTCC CTT GGTCTC TTCTCC TTAAAACTCCTCGATGTAATCCCCG	AGAGGTCTCACCATGGACCAAGATATTAAAACAATCATTCAGTACCCAACAGGAGCCACTGAGTTTGACATCCCGTTTGACTACCTGTCCCGCAAGTTTGTCCGCGTGTCTCTGGTATCGGACGACAACCGCCGACTCTTGCGCAACATCACGGAGTACCGTTACGTGTCGAAGACTCGCGTTAAGATTCTGGTGGACACCACTGGGTTCGACCGAGTTGAAATCCGACGGTTCACCTCAGCGTCTGAACGTGTTGTGGACTTCAGTGATGGCTCTGTGCTCCGCGCTAACGACCTAAACGTGTCCCAGCTACAGTCTTCACATATTGCCGAAGAGGCCCGTGACAGTGCGCTTCTGGCCATGCCTGAGGATGATGCTGGTAACCTCGACGCGAGAAAC…
Anchor_T4gp10_P2P5_4	KP32gp37AB_1/256	Anchor_T4gp10_P2P5_4_FOR	GTG GCTCTTCC AGA GGTCTC ACCATG GACCAAGATATTAAAACAATCATTCAGTAC	Anchor_T4gp10_P2P5_4_REV	ATA GCTCTTCA CTT GGTCTC TTCTCC TTAGGTAAGCATTACAACAAAGTCG	AGAGGTCTCACCATGGACCAAGATATTAAAACAATCATTCAGTACCCAACAGGAGCCACTGAGTTTGACATCCCGTTTGACTACCTGTCCCGCAAGTTTGTCCGCGTGTCTCTGGTATCGGACGACAACCGCCGACTCTTGCGCAACATCACGGAGTACCGTTACGTGTCGAAGACTCGCGTTAAGATTCTGGTGGACACCACTGGGTTCGACCGAGTTGAAATCCGACGGTTCACCTCAGCGTCTGAACGTGTTGTGGACTTCAGTGATGGCTCTGTGCTCCGCGCTAACGACCTAAACGTGTCCCAGCTACAGTCTTCACATATTGCCGAAGAGGCCCGTGACAGTGCGCTTCTGGCCATGCCTGAGGATGATGCTGGTAACCTCGACGCGAGAAAC…
RBP_P2P7_2	KP32gp38whole_1/577	RBP_P2P7_2_FOR	ATA GCTCTTCC AGA GGTCTC ACCATG TTAGACAATTTCAATCAGCCGAAAG	RBP_P2P7_2_REV	GTA GCTCTTCA CTT GGTCTC ATTACC TCCTTATGATACGAATGCCCTTACTCG	AGAGGTCTCACCATGTTAGACAATTTCAATCAGCCGAAAGGCTCAACCATTGGTGTGCTCAAGGATGGGCGCACTATCCAAGAGGCATTCGACTCATTACCGCGCCTTGAGTCCTTCTCTGGGTCCACGGCAACCGACAAGCTACGCGCAGCCATCACCTTAGGTGTATCTGAGGTCGCCATCGGTCCTGTTGAAGGTAACGGCGGAAGGCCTTATGAGTTCGGGGATGTAGTCATTCCGTATCCTCTGCGTATTGTAGGTTGTGGTTCTCAAGGTATCAACGTTACCAAGGGAACAGTCCTCAAGCGTTCTGCGGGTGCATCCTTCATGTTCCACTTCACGGGCGAGGGACAAGCTCAGCGTCCTATGGGCGGTGGGTTGTTTAACATCAACCTGAAT…
RBP_P3P5_1	K1Fgp17E_246/1065	RBP_P3P5_1_FOR	ATA GCTCTTCA AGA GGTCTC GGTTCA GCTAAAGGGGATGGTGTCACTGATG	RBP_P3P5_1_REV	ATA GCTCTTCA CTT GGTCTC TTCTCC TTACTTCTGTTCAAGAGCAGAA AGTCTGGC	AGAGGTCTCGGTTCAGCTAAAGGGGATGGTGTCACTGATGATACAGCAGCGTTAACGAGCGCATTAAACGACACACCGGTTGGACAAAAGATTAATGGCAATGGGAAGACATATAAGGTCACATCCCTGCCTGACATTAGTCGCTTCATCAACACTCGTTTCGTTTATGAGCGCATTCCCGGACAACCTCTTTATTATGCCTCTGAAGAATTTGTTCAGGGTGAGCTATTCAAAATAACGGACACCCCTTATTACAATGCGTGGCCTCAGGATAAAGCGTTCGTATATGAGAATGTGATATATGCACCTTACATGGGTAGCGATCGTCATGGTGTTAGTCGTCTGCATGTATCATGGGTTAAGTCTGGTGATGATGGTCAAACATGGTCTACTCCAGAG…
T4gp10_RBP_P3P5_2	K11gp17BE_179/876, BsaI recognition site mutated	T4gp10_RBP_P3P5_2_FOR	GTG GCTCTTCA AGA GGTCTC GGTTCT TTAGACAATTTCAATCAGCCG	T4gp10_RBP_P3P5_2_REV	GTG GCTCTTCA CTT GGTCTC TTCTCC TTATAAAACAAATGATGCTAATCTCGAGATGTTC	AGAGGTCTCGGTTCAGCAGATGACACCACGTCTCTCAAGGGAATCAACTGGGTGTATAACAATGGGTCGGCCAATGGTGGCGAGACATCCATCCTGATTACCCGCGAGGGGCCAGTGTTCGCTGTGCCTACCATTTACATCAATGGGGACAGACAGTCTGTTGGTTACCACTACTCTTACGACTCCGGTGATAAGACCATTCACCTAGTTAAGCCGCTAACTGCTGGAGACTTTGTGGAATGTGTTACCTCTGAGGGCGTACTGCCGCTGTCTAATCTTCTGTCGACACCAGACGGGGCCAGTCAGATTGGCACTAAAAGCGGCCTGACTGTGCAAGACTACCTTAACGGCGTGAAGTCCGCTACCATCCTGCGCAACATTGAGCCAGTCATTGATGGA…
RBP_P3P5_7	KP32gp37E_257/870	RBP_P3P5_7_FOR	GTG GCTCTTCA AGA GGTCTC GGTTCA TCTGAAGGTACTCACTCATTAGCGTC	RBP_P3P5_7_REV	ATA GCTCTTCC CTT GGTCTC TTCTCC TTATTTGTAGGTCAGGCCGAG	AGAGGTCTCGGTTCATCTGAAGGTACTCACTCATTAGCGTCCATACTGGCAGGCCCTGACGGTGCAAGCCGAATCGGGGCGTCTGGCGGACTTACCGTTCAACAGGCGATTGACCGTATCCTTGAGAGCCATATTATCCTACCACAGTGGTTCGGTGCACGTGGCGACTGGAGCGATACGACAAATACTGGTACCGATGATACAGCAGCCTTCGAGGCGGCTATCGAGATGGCTGTCACCTTGAATTATACAGAGGTGTATGTCCCGGCTGGTTCCTACTTGATTACACGTGAGTTAAACCTCAACGGTGGAAATCGGAATACCCGCCTAGGTGCTCGCATCCGTGGAGCAGGTTGGGCCTCCTCAGTGCTGGTCTTTAAGGCACCAGCGCCAGAGACT…
T4gp10_RPB_P3P5_8	KP32gp37BE_179/870	T4gp10_RPB_P3P5_8_FOR	GTG GCTCTTCC AGA GGTCTC GGTTCA GCCAACGGAACGACTTACCTTAAG	T4gp10_RPB_P3P5_8_REV	ATA GCTCTTCC CTT GGTCTC TTCTCC TTATTTGTAGGTCAGGCCGAG	AGAGGTCTCGGTTCAGCCAACGGAACGACTTACCTTAAGAACATCGTAATGGTGTACAACCAAGGGTCTGCCAATGGTGGGGAAACCGCTATCGTCCTCGACAGGACCGACGAAGTGTTTGCTGTCCCAGTGATTTACATCAACGGTGACAGACAAGAAGTTGGCTTCCAGTTCTCCTACGACAACACCACCAAGACGATTACCCTCGTTAAGCCGCTGCAACGTGGCGACTTTGTTGTAATGCTTACCTCTGAAGGTACTCACTCATTAGCGTCCATACTGGCAGGCCCTGACGGTGCAAGCCGAATCGGGGCGTCTGGCGGACTTACCGTTCAACAGGCGATTGACCGTATCCTTGAGAGCCATATTATCCTACCACAGTGGTTCGGTGCACGTGGC…
RBP_P3P5_9	K1Fgp17E_147/1065	RBP_P3P5_9_FOR	GTG GCTCTTCA AGA GGTCTC GGTTCA GGTCTAATTGGTTATATGACCCGTCGCTC	RBP_P3P5_9_REV	ATA GCTCTTCA CTT GGTCTC TTCTCC TTACTTCTGTTCAAGAGCAGAAAGTCTGGC	AGAGGTCTCGGTTCAGGTCTAATTGGTTATATGACCCGTCGCTCCTTCGAGAAAGGCTACAACGTTACAACATGGAGCGAGGTCCTGCTATGGGAAGAGGATGGTGATTATTACCGCTGGGATGGTACGCTTCCAAAGAACGTTCCTGCTGGTTCAACTCCTGAAACTTCCGGTGGGATTGGATTAGGTGCGTGGGTTAGTGTTGGTGATGCTGCTTTAAGAAGTCAGATTTCAAACCCGGAAGGGGCAATACTCTACCCTGAATTACATAGAGCACGCTGGCTTGATGAAAAAGATGCTCGTGGTTGGGGTGCTAAAGGGGATGGTGTCACTGATGATACAGCAGCGTTAACGAGCGCATTAAACGACACACCGGTTGGACAAAAGATTAATGGCAAT…
RBP_P3P5_10	K1Fgp17E_246/1065	RBP_P3P5_10_FOR	ATA GCTCTTCA AGA GGTCTC GGTTCA GCTAAAGGGGATGGTGTCACTGATG	RBP_P3P5_10_REV	ATA GCTCTTCA CTT GGTCTC TTCTCC TTACTTCTGTTCAAGAGCAGAAAGTCTGGC	AGAGGTCTCGGTTCAGCTAAAGGGGATGGTGTCACTGATGATACAGCAGCGTTAACGAGCGCATTAAACGACACACCGGTTGGACAAAAGATTAATGGCAATGGGAAGACATATAAGGTCACATCCCTGCCTGACATTAGTCGCTTCATCAACACTCGTTTCGTTTATGAGCGCATTCCCGGACAACCTCTTTATTATGCCTCTGAAGAATTTGTTCAGGGTGAGCTATTCAAAATAACGGACACCCCTTATTACAATGCGTGGCCTCAGGATAAAGCGTTCGTATATGAGAATGTGATATATGCACCTTACATGGGTAGCGATCGTCATGGTGTTAGTCGTCTGCATGTATCATGGGTTAAGTCTGGTGATGATGGTCAAACATGGTCTACTCCAGAG…
RBP_P3P7_30	KP32gp38whole_1/577	RBP_P3P7_30_FOR	GTG GCTCTTCA AGA GGTCTC GGTTCA TTAGACAATTTCAATCAGCCG	RBP_P3P7_30_REV	GTA GCTCTTCA CTT GGTCTC ATTACC TCCTTATGATACGAATGCCCTTACTCG	AGAGGTCTCGGTTCATTAGACAATTTCAATCAGCCGAAAGGCTCAACCATTGGTGTGCTCAAGGATGGGCGCACTATCCAAGAGGCATTCGACTCATTACCGCGCCTTGAGTCCTTCTCTGGGTCCACGGCAACCGACAAGCTACGCGCAGCCATCACCTTAGGTGTATCTGAGGTCGCCATCGGTCCTGTTGAAGGTAACGGCGGAAGGCCTTATGAGTTCGGGGATGTAGTCATTCCGTATCCTCTGCGTATTGTAGGTTGTGGTTCTCAAGGTATCAACGTTACCAAGGGAACAGTCCTCAAGCGTTCTGCGGGTGCATCCTTCATGTTCCACTTCACGGGCGAGGGACAAGCTCAGCGTCCTATGGGCGGTGGGTTGTTTAACATCAACCTGAAT…
RBP_P3P7_33	KP32gp37BE_179/870	RBP_P3P7_33_FOR	GTG GCTCTTCC AGA GGTCTC GGTTCA GCCAACGGAACGACTTACCTTAAG	RBP_P3P7_33_REV	ATA GCTCTTCA CTT GGTCTC ATTACC TCCTTATTTGTAGGTCAGGCCGAGCTTAC	AGAGGTCTCGGTTCAGCCAACGGAACGACTTACCTTAAGAACATCGTAATGGTGTACAACCAAGGGTCTGCCAATGGTGGGGAAACCGCTATCGTCCTCGACAGGACCGACGAAGTGTTTGCTGTCCCAGTGATTTACATCAACGGTGACAGACAAGAAGTTGGCTTCCAGTTCTCCTACGACAACACCACCAAGACGATTACCCTCGTTAAGCCGCTGCAACGTGGCGACTTTGTTGTAATGCTTACCTCTGAAGGTACTCACTCATTAGCGTCCATACTGGCAGGCCCTGACGGTGCAAGCCGAATCGGGGCGTCTGGCGGACTTACCGTTCAACAGGCGATTGACCGTATCCTTGAGAGCCATATTATCCTACCACAGTGGTTCGGTGCACGTGGC…
RBP_P4P5_6	K1Fgp17E_147/1065	RBP_P4P5_6_FOR	ATA GCTCTTCA AGA GGTCTC TCTGAA GGTCTAATTGGTTATATGACCCGTCGCTC	RBP_P4P5_6_REV	ATA GCTCTTCA CTT GGTCTC TTCTCC TTACTTCTGTTCAAGAGCAGAAAGTCTGGC	AGAGGTCTCTCTGAAGGTCTAATTGGTTATATGACCCGTCGCTCCTTCGAGAAAGGCTACAACGTTACAACATGGAGCGAGGTCCTGCTATGGGAAGAGGATGGTGATTATTACCGCTGGGATGGTACGCTTCCAAAGAACGTTCCTGCTGGTTCAACTCCTGAAACTTCCGGTGGGATTGGATTAGGTGCGTGGGTTAGTGTTGGTGATGCTGCTTTAAGAAGTCAGATTTCAAACCCGGAAGGGGCAATACTCTACCCTGAATTACATAGAGCACGCTGGCTTGATGAAAAAGATGCTCGTGGTTGGGGTGCTAAAGGGGATGGTGTCACTGATGATACAGCAGCGTTAACGAGCGCATTAAACGACACACCGGTTGGACAAAAGATTAATGGCAAT…
RBP_P4P5_7	K1Fgp17E_246/1065	RBP_P4P5_7_FOR	ATA GCTCTTCA AGA GGTCTC TCTGAA GCTAAAGGGGATGGTGTCACTGATG	RBP_P4P5_7_REV	ATA GCTCTTCA CTT GGTCTC TTCTCC TTACTTCTGTTCAAGAGCAGAAAGTCTGGC	AGAGGTCTCTCTGAAGCTAAAGGGGATGGTGTCACTGATGATACAGCAGCGTTAACGAGCGCATTAAACGACACACCGGTTGGACAAAAGATTAATGGCAATGGGAAGACATATAAGGTCACATCCCTGCCTGACATTAGTCGCTTCATCAACACTCGTTTCGTTTATGAGCGCATTCCCGGACAACCTCTTTATTATGCCTCTGAAGAATTTGTTCAGGGTGAGCTATTCAAAATAACGGACACCCCTTATTACAATGCGTGGCCTCAGGATAAAGCGTTCGTATATGAGAATGTGATATATGCACCTTACATGGGTAGCGATCGTCATGGTGTTAGTCGTCTGCATGTATCATGGGTTAAGTCTGGTGATGATGGTCAAACATGGTCTACTCCAGAG…
CP_P5P6_2	KP32gp38CP_1/35	CP_P5P6_2_FOR	GTG GCTCTTCC AGA GGTCTC GGAGAA CCTCATGTTAGACAATTTCAATCAG	CP_P5P6_2_REV	ATA GCTCTTCC CTT GGTCTC TCCGCT GAAGGACTCAAGGCGCGGTAATG	AGAGGTCTCGGAGAACCTCATGTTAGACAATTTCAATCAGCCGAAAGGCTCAACCATTGGTGTGCTCAAGGATGGGCGCACTATCCAAGAGGCATTCGACTCATTACCGCGCCTTGAGTCCTTCAGCGGAGAGACCAAG
RBP_P5P7_7	KP32gp38ELinCBMLEC_30/577	RBP_P5P7_7_FOR	ATA GCTCTTCC AGA GGTCTC GGAGAA CCTCATGCCGCGCCTTGAGTCCTTCTC	RBP_P5P7_7_REV	GTA GCTCTTCA CTT GGTCTC ATTACC TCCTTATGATACGAATGCCCTTACTCG	AGAGGTCTCGGAGAACCTCATGCCGCGCCTTGAGTCCTTCTCTGGGTCCACGGCAACCGACAAGCTACGCGCAGCCATCACCTTAGGTGTATCTGAGGTCGCCATCGGTCCTGTTGAAGGTAACGGCGGAAGGCCTTATGAGTTCGGGGATGTAGTCATTCCGTATCCTCTGCGTATTGTAGGTTGTGGTTCTCAAGGTATCAACGTTACCAAGGGAACAGTCCTCAAGCGTTCTGCGGGTGCATCCTTCATGTTCCACTTCACGGGCGAGGGACAAGCTCAGCGTCCTATGGGCGGTGGGTTGTTTAACATCAACCTGAATGGGGACACAGCGACAGCTCTGGGAGACATAATCAAGGTTACGCAGTGGTCTTACTTCAAGGCTAATAACTGCGCGTT…
RBP_P5P7_2	KP32gp38whole_1/577	RBP_P5P7_2_FOR	ATA GCTCTTCA AGA GGTCTC GGAGAA CCTCATGTTAGACAATTTCAATCAGCCGAAAG	RBP_P5P7_2_REV	GTA GCTCTTCA CTT GGTCTC ATTACC TCCTTATGATACGAATGCCCTTACTCG	AGAGGTCTCGGAGAACCTCATGTTAGACAATTTCAATCAGCCGAAAGGCTCAACCATTGGTGTGCTCAAGGATGGGCGCACTATCCAAGAGGCATTCGACTCATTACCGCGCCTTGAGTCCTTCTCTGGGTCCACGGCAACCGACAAGCTACGCGCAGCCATCACCTTAGGTGTATCTGAGGTCGCCATCGGTCCTGTTGAAGGTAACGGCGGAAGGCCTTATGAGTTCGGGGATGTAGTCATTCCGTATCCTCTGCGTATTGTAGGTTGTGGTTCTCAAGGTATCAACGTTACCAAGGGAACAGTCCTCAAGCGTTCTGCGGGTGCATCCTTCATGTTCCACTTCACGGGCGAGGGACAAGCTCAGCGTCCTATGGGCGGTGGGTTGTTTAACATCAA…
RBP_P6P7_7	K1Fgp17E_147/1065	RBP_P6P7_7_FOR	ATA GCTCTTCA AGA GGTCTC AGCGGA GGTCTAATTGGTTATATGACCCGTCGCTC	RBP_P6P7_7_REV	GTA GCTCTTCA CTT GGTCTC ATTACC TCCTTACTTCTGTTCAAGAGCAGAAAGTCTGGC	AGAGGTCTCAGCGGAGGTCTAATTGGTTATATGACCCGTCGCTCCTTCGAGAAAGGCTACAACGTTACAACATGGAGCGAGGTCCTGCTATGGGAAGAGGATGGTGATTATTACCGCTGGGATGGTACGCTTCCAAAGAACGTTCCTGCTGGTTCAACTCCTGAAACTTCCGGTGGGATTGGATTAGGTGCGTGGGTTAGTGTTGGTGATGCTGCTTTAAGAAGTCAGATTTCAAACCCGGAAGGGGCAATACTCTACCCTGAATTACATAGAGCACGCTGGCTTGATGAAAAAGATGCTCGTGGTTGGGGTGCTAAAGGGGATGGTGTCACTGATGATACAGCAGCGTTAACGAGCGCATTAAACGACACACCGGTTGGACAAAAGATTAATGGCAAT…
RBP_P6P7_8	K1Fgp17E_246/1065	RBP_P6P7_8_FOR	ATA GCTCTTCA AGA GGTCTC AGCGGA GCTAAAGGGGATGGTGTCACTGATG	RBP_P6P7_8_REV	GTA GCTCTTCA CTT GGTCTC ATTACC TCCTTACTTCTGTTCAAGAGCAGAAAGTCTGGC	AGAGGTCTCAGCGGAGCTAAAGGGGATGGTGTCACTGATGATACAGCAGCGTTAACGAGCGCATTAAACGACACACCGGTTGGACAAAAGATTAATGGCAATGGGAAGACATATAAGGTCACATCCCTGCCTGACATTAGTCGCTTCATCAACACTCGTTTCGTTTATGAGCGCATTCCCGGACAACCTCTTTATTATGCCTCTGAAGAATTTGTTCAGGGTGAGCTATTCAAAATAACGGACACCCCTTATTACAATGCGTGGCCTCAGGATAAAGCGTTCGTATATGAGAATGTGATATATGCACCTTACATGGGTAGCGATCGTCATGGTGTTAGTCGTCTGCATGTATCATGGGTTAAGTCTGGTGATGATGGTCAAACATGGTCTACTCCAGAG…
RBP_End_P5P8_1	KP32gp38whole_1/577_End	RBP_End_P5P8_1_FOR	GTG GCTCTTCC AGA GGTCTC GGAGAA CCTCATGTTAGACAATTTCAATCAG	RBP_End_P5P8_1_REV	ATA GCTCTTCC CTT GGTCTC TTTCTT CCAGTCAATGATTTTATCGACTAC	AGAGGTCTCGGAGAACCTCATGTTAGACAATTTCAATCAGCCGAAAGGCTCAACCATTGGTGTGCTCAAGGATGGGCGCACTATCCAAGAGGCATTCGACTCATTACCGCGCCTTGAGTCCTTCTCTGGGTCCACGGCAACCGACAAGCTACGCGCAGCCATCACCTTAGGTGTATCTGAGGTCGCCATCGGTCCTGTTGAAGGTAACGGCGGAAGGCCTTATGAGTTCGGGGATGTAGTCATTCCGTATCCTCTGCGTATTGTAGGTTGTGGTTCTCAAGGTATCAACGTTACCAAGGGAACAGTCCTCAAGCGTTCTGCGGGTGCATCCTTCATGTTCCACTTCACGGGCGAGGGACAAGCTCAGCGTCCTATGGGCGGTGGGTTGTTTAACATCAA…
End_P7P8_KP32	KP32 bp 37774-37968 (after gp38)	End_P7P8_KP32_FOR	ATA GCTCTTCC AGA GGTCTC GGTAAT ATGTTGTCCCTAGACTTCAATAAC	End_P7P8_KP32_REV	ATA GCTCTTCC CTT GGTCTC TTTCTT CCAGTCAATGATTTTATCGACTAC	AGAGGTCTCGGTAATATGTTGTCCCTAGACTTCAATAACGAAGTTATCAAGGCGGCTCCCATTGCGGGTGTCGCTGGGGCCGATGGTGTAGCGAGGCTCTTCTGGGGCCTCTCACTCAACGAGTGGTTCTACGTCGCGGCAATCGCCTACACAGTGGTTCAGATTGGTGCCAAGGTAGTCGATAAAATCATTGACTGGAAGAAAGAGACCAAG
End_P7P8_K1F	K1F bp 35856-35997 (after gp17)	End_P7P8_K1F_FOR	GCC GCTCTTCA AGA GGTCTC GGTAAT TAAACAAAACCATTTTGCCATTAAGTTG	End_P7P8_K1F_REV	GCC GCTCTTCA CTT GGTCTC TTTCTT CTCAATCATAAAACCTCCAGTTTAAAG	AGAGGTCTCGGTAATTAAACAAAACCATTTTGCCATTAAGTTGGTGGGGTAGATGTTAGAAGGTTGTGGAGGTAGAGGCTAACTACACGCTAACCAACGTATGTAACAACTTTGGGTCACGGACGACCCGCTTTAAACTGGAGGTTTTATGATTGAGAAGAAAGAGACCAAG

## Sheet: Table S2
Table S2. Composition of tiles to assamble RBPs gene cluster of enginnered phages (ePs). Only succesfully rebooted phages are presented.
	eP name and scheme	Tile name	Tile explanation	Tile seqence
	KP32_gp37_B_E::KP34gp57	Start_Anchor_P1P3_1	KP32_bp 33238-33422_KP32gp37A_1/178	AGAGGTCTCTGACTGGCCTGATGAACTCCACAAAGGAGCTTGTGCCAAACGACCCGCTTACCCAACAGCTAATCATGAAAATCTATGAAGCTAATGGTGTCACCATAAAGCAGCAGCCTAGACCCAACTAATTAGGGCACACTATAGGGAGGCCGACTGGTTTCCCTCCTATTCAACTTAAGGAGGTCACCATGGACCAAGATATTAAAACAATCATTCAGTACCCAACAGGAGCCACTGAGTTTGACATCCCGTTTGACTACCTGTCCCGCAAGTTTGTCCGCGTGTCTCTGGTATCGGACGACAACCGCCGACTCTTGCGCAACATCACGGAGTACCGTTACGTGTCGAAGACTCGCGTTAAGATTCTGGTGGACACCACTGGGTTCGACCGAGTTG…
		RBP_P3P5_1	KP34p57whole_2/631	AGAGGTCTCGGTTCAGCACTCACTAAACTAGTAGATGCAGGCGCCTGGCAAGTAGAAGTAGCCCCAGCTGGCACAGTACAGGATTCCCTAGTATTCTTATCCCCACGCAACTTCGGAGGAGTACCAGGCACGGGCGTAGATAGTGTAGCAGCTATAGAAGCCGCCCTAGCGGCAGGCGACGTAGACTTAGGTGGTGAGCACTGGTTTATTAGCAGGCCCATCTATTGCGTATCCGGCCGTACCATTCAGAACGGTAAGATTTCTACCTTAGCAGCCCAAGGCTCTGGGTTTATGGCTGGCAGTATCTTCGCACCGGGGAACTATCACCCTGTATACGTAGACCCTGTGCCGAAGCTGGCATGCTCAAGTACAAACGGCTCAGCCACTATTACAGTAAGC…
		RBP_End_P5P8_1	KP32gp38whole_1/577_bp 37774-37968	AGAGGTCTCGGAGAACCTCATGTTAGACAATTTCAATCAGCCGAAAGGCTCAACCATTGGTGTGCTCAAGGATGGGCGCACTATCCAAGAGGCATTCGACTCATTACCGCGCCTTGAGTCCTTCTCTGGGTCCACGGCAACCGACAAGCTACGCGCAGCCATCACCTTAGGTGTATCTGAGGTCGCCATCGGTCCTGTTGAAGGTAACGGCGGAAGGCCTTATGAGTTCGGGGATGTAGTCATTCCGTATCCTCTGCGTATTGTAGGTTGTGGTTCTCAAGGTATCAACGTTACCAAGGGAACAGTCCTCAAGCGTTCTGCGGGTGCATCCTTCATGTTCCACTTCACGGGCGAGGGACAAGCTCAGCGTCCTATGGGCGGTGGGTTGTTTAACATCAA…
	KP32_gp37_A_B_E::K11gp17	Start_P1P2_KP32	KP32 bp 33238-33422 (before gp37)	AGAGGTCTCTGACTGGCCTGATGAACTCCACAAAGGAGCTTGTGCCAAACGACCCGCTTACCCAACAGCTAATCATGAAAATCTATGAAGCTAATGGTGTCACCATAAAGCAGCAGCCTAGACCCAACTAATTAGGGCACACTATAGGGAGGCCGACTGGTTTCCCTCCTATTCAACTTAAGGAGGTCACCATGGAGACCAAG
		RBP_P2P5_1	K11gp17AE_2/875, BsaI mutation	AGAGGTCTCACCATGGACCAAGACATTAAAACAGTCATTCAGTACCCAGTAGGGGCCACTGAGTTCGACATCCCGTTCGACTACCTGTCCCGTAAGTTTGTCCGTGTGTCGCTGGCAGCTGACGACAACCGCAGACTGCTGAGTAACATCACTGAGTACCGCTACGTGTCTAAGACCAGAGTGAAGCTCCTTGTGGAAACTACCGGGTTCGACCGTGTGGAAATCCGCAGATTCACCTCAGCGTCTGAGCGTATTGTTGACTTCAGCGACGGCTCCGTACTGCGGGCAACAGACCTTAACGTTTCTCAGATTCAGTCTGCCCATATCGCAGAGGAAGCACGTGATTCAGCACTGTTGGCTATGCCGCAGGATGATGCTGGCAACCTTGATGCCCGTAAC…
		RBP_End_P5P8_1	KP32gp38whole_1/577_bp 37774-37968	AGAGGTCTCGGAGAACCTCATGTTAGACAATTTCAATCAGCCGAAAGGCTCAACCATTGGTGTGCTCAAGGATGGGCGCACTATCCAAGAGGCATTCGACTCATTACCGCGCCTTGAGTCCTTCTCTGGGTCCACGGCAACCGACAAGCTACGCGCAGCCATCACCTTAGGTGTATCTGAGGTCGCCATCGGTCCTGTTGAAGGTAACGGCGGAAGGCCTTATGAGTTCGGGGATGTAGTCATTCCGTATCCTCTGCGTATTGTAGGTTGTGGTTCTCAAGGTATCAACGTTACCAAGGGAACAGTCCTCAAGCGTTCTGCGGGTGCATCCTTCATGTTCCACTTCACGGGCGAGGGACAAGCTCAGCGTCCTATGGGCGGTGGGTTGTTTAACATCAA…
	KP32_gp38ΔCP	Start_P1P2_KP32	KP32 bp 33238-33422 (before gp37)	AGAGGTCTCTGACTGGCCTGATGAACTCCACAAAGGAGCTTGTGCCAAACGACCCGCTTACCCAACAGCTAATCATGAAAATCTATGAAGCTAATGGTGTCACCATAAAGCAGCAGCCTAGACCCAACTAATTAGGGCACACTATAGGGAGGCCGACTGGTTTCCCTCCTATTCAACTTAAGGAGGTCACCATGGAGACCAAG
		RBP_P2P5_2	KP32gp37AE_2/869	AGAGGTCTCACCATGGACCAAGATATTAAAACAATCATTCAGTACCCAACAGGAGCCACTGAGTTTGACATCCCGTTTGACTACCTGTCCCGCAAGTTTGTCCGCGTGTCTCTGGTATCGGACGACAACCGCCGACTCTTGCGCAACATCACGGAGTACCGTTACGTGTCGAAGACTCGCGTTAAGATTCTGGTGGACACCACTGGGTTCGACCGAGTTGAAATCCGACGGTTCACCTCAGCGTCTGAACGTGTTGTGGACTTCAGTGATGGCTCTGTGCTCCGCGCTAACGACCTAAACGTGTCCCAGCTACAGTCTTCACATATTGCCGAAGAGGCCCGTGACAGTGCGCTTCTGGCCATGCCTGAGGATGATGCTGGTAACCTCGACGCGAGAAAC…
		RBP_P5P7_7	KP32gp38EnzLinCBMLEC_30/577	AGAGGTCTCGGAGAACCTCATGCCGCGCCTTGAGTCCTTCTCTGGGTCCACGGCAACCGACAAGCTACGCGCAGCCATCACCTTAGGTGTATCTGAGGTCGCCATCGGTCCTGTTGAAGGTAACGGCGGAAGGCCTTATGAGTTCGGGGATGTAGTCATTCCGTATCCTCTGCGTATTGTAGGTTGTGGTTCTCAAGGTATCAACGTTACCAAGGGAACAGTCCTCAAGCGTTCTGCGGGTGCATCCTTCATGTTCCACTTCACGGGCGAGGGACAAGCTCAGCGTCCTATGGGCGGTGGGTTGTTTAACATCAACCTGAATGGGGACACAGCGACAGCTCTGGGAGACATAATCAAGGTTACGCAGTGGTCTTACTTCAAGGCTAATAACTGCGCGTT…
		End_P7P8_KP32	KP32 bp 37774-37968 (after gp38)	AGAGGTCTCGGTAATATGTTGTCCCTAGACTTCAATAACGAAGTTATCAAGGCGGCTCCCATTGCGGGTGTCGCTGGGGCCGATGGTGTAGCGAGGCTCTTCTGGGGCCTCTCACTCAACGAGTGGTTCTACGTCGCGGCAATCGCCTACACAGTGGTTCAGATTGGTGCCAAGGTAGTCGATAAAATCATTGACTGGAAGAAAGAGACCAAG
	KP32_gp38E::K1Fgp17E2	Start_P1P2_KP32	KP32 bp 33238-33422 (before gp37)	AGAGGTCTCTGACTGGCCTGATGAACTCCACAAAGGAGCTTGTGCCAAACGACCCGCTTACCCAACAGCTAATCATGAAAATCTATGAAGCTAATGGTGTCACCATAAAGCAGCAGCCTAGACCCAACTAATTAGGGCACACTATAGGGAGGCCGACTGGTTTCCCTCCTATTCAACTTAAGGAGGTCACCATGGAGACCAAG
		RBP_P2P5_2	KP32gp37AE_2/869	AGAGGTCTCACCATGGACCAAGATATTAAAACAATCATTCAGTACCCAACAGGAGCCACTGAGTTTGACATCCCGTTTGACTACCTGTCCCGCAAGTTTGTCCGCGTGTCTCTGGTATCGGACGACAACCGCCGACTCTTGCGCAACATCACGGAGTACCGTTACGTGTCGAAGACTCGCGTTAAGATTCTGGTGGACACCACTGGGTTCGACCGAGTTGAAATCCGACGGTTCACCTCAGCGTCTGAACGTGTTGTGGACTTCAGTGATGGCTCTGTGCTCCGCGCTAACGACCTAAACGTGTCCCAGCTACAGTCTTCACATATTGCCGAAGAGGCCCGTGACAGTGCGCTTCTGGCCATGCCTGAGGATGATGCTGGTAACCTCGACGCGAGAAAC…
		CP_P5P6_2	KP32CP_1/35	AGAGGTCTCGGAGAACCTCATGTTAGACAATTTCAATCAGCCGAAAGGCTCAACCATTGGTGTGCTCAAGGATGGGCGCACTATCCAAGAGGCATTCGACTCATTACCGCGCCTTGAGTCCTTCAGCGGAGAGACCAAG
		RBP_P6P7_8	K1F_gp17_246/1065	AGAGGTCTCAGCGGAGCTAAAGGGGATGGTGTCACTGATGATACAGCAGCGTTAACGAGCGCATTAAACGACACACCGGTTGGACAAAAGATTAATGGCAATGGGAAGACATATAAGGTCACATCCCTGCCTGACATTAGTCGCTTCATCAACACTCGTTTCGTTTATGAGCGCATTCCCGGACAACCTCTTTATTATGCCTCTGAAGAATTTGTTCAGGGTGAGCTATTCAAAATAACGGACACCCCTTATTACAATGCGTGGCCTCAGGATAAAGCGTTCGTATATGAGAATGTGATATATGCACCTTACATGGGTAGCGATCGTCATGGTGTTAGTCGTCTGCATGTATCATGGGTTAAGTCTGGTGATGATGGTCAAACATGGTCTACTCCAGAG…
		End_P7P8_KP32	KP32 bp 37774-37968 (after gp38)	AGAGGTCTCGGTAATATGTTGTCCCTAGACTTCAATAACGAAGTTATCAAGGCGGCTCCCATTGCGGGTGTCGCTGGGGCCGATGGTGTAGCGAGGCTCTTCTGGGGCCTCTCACTCAACGAGTGGTTCTACGTCGCGGCAATCGCCTACACAGTGGTTCAGATTGGTGCCAAGGTAGTCGATAAAATCATTGACTGGAAGAAAGAGACCAAG
	*E1: aa 147-1065; E2: aa 246-1065
	K1F_gp17E1::KP32gp38	Start_P1P2_K1F	K1F bp 32482-32663 (before gp17)	AGAGGTCTCTGACTGCATGACCGGGATGTATAATACGTTCCGTGAACTGGTTCCGAACGACCCCATTACCCAGAAGCTGTTGCTTGGAATGTTTGAGGAGCAAGGCATCCACATCAAGGACTAAACTATCACTATAGGAAACGGGAGGCGCTACCATAGGTATCCGCTTAAATCACAAAGGAGGCACCATGGAGACCAAG
		Anchor_P2P3_15	K1FAnchor_1/146, BsaI removed	AGAGGTCTCACCATGTCTCACAGTTCAAGAACCTCAAGTCTCCCCATAGGCCCTCTTTAAGTCCAGACCAAAGGCCCTACCCCAGTCTATCATAAGGTTGGACCGATGGTCAAGACGTCAGGTCAACGATAGGTCTAGGCTATGGCTTAGGGAAGGACGATGGTTCAGAGACCAAG
		RBP_P3P7_30	KP32gp38whole_2/577	AGAGGTCTCGGTTCATTAGACAATTTCAATCAGCCGAAAGGCTCAACCATTGGTGTGCTCAAGGATGGGCGCACTATCCAAGAGGCATTCGACTCATTACCGCGCCTTGAGTCCTTCTCTGGGTCCACGGCAACCGACAAGCTACGCGCAGCCATCACCTTAGGTGTATCTGAGGTCGCCATCGGTCCTGTTGAAGGTAACGGCGGAAGGCCTTATGAGTTCGGGGATGTAGTCATTCCGTATCCTCTGCGTATTGTAGGTTGTGGTTCTCAAGGTATCAACGTTACCAAGGGAACAGTCCTCAAGCGTTCTGCGGGTGCATCCTTCATGTTCCACTTCACGGGCGAGGGACAAGCTCAGCGTCCTATGGGCGGTGGGTTGTTTAACATCAACCTGAAT…
		End_P7P8_K1F	K1F bp 35856-35997 (after gp17)	AGAGGTCTCGGTAATTAAACAAAACCATTTTGCCATTAAGTTGGTGGGGTAGATGTTAGAAGGTTGTGGAGGTAGAGGCTAACTACACGCTAACCAACGTATGTAACAACTTTGGGTCACGGACGACCCGCTTTAAACTGGAGGTTTTATGATTGAGAAG AAAGAGACCAAG
	*E1: aa 147-1065; E2: aa 246-1065, see Figure S1

## Sheet: Table S3
Table S3. Composition of tiles to assamble RBPs gene cluster of enginnered phages (ePs). Rebooting process of presented phages was not succesful.
eP name and scheme	Tile name	Tile explanation	Tile seqence
KP32_gp37_B_E::K11gp17_B_E	Start_Anchor_P1P3_1	KP32_bp 33238-33422_KP32gp37A_1/178	AGAGGTCTCTGACTGGCCTGATGAACTCCACAAAGGAGCTTGTGCCAAACGACCCGCTTACCCAACAGCTAATCATGAAAATCTATGAAGCTAATGGTGTCACCATAAAGCAGCAGCCTAGACCCAACTAATTAGGGCACACTATAGGGAGGCCGACTGGTTTCCCTCCTATTCAACTTAAGGAGGTCACCATGGACCAAGATATTAAAACAATCATTCAGTACCCAACAGGAGCCACTGAGTTTGACATCCCGTTTGACTACCTGTCCCGCAAGTTTGTCCGCGTGTCTCTGGTATCGGACGACAACCGCCGACTCTTGCGCAACATCACGGAGTACCGTTACGTGTCGAAGACTCGCGTTAAGATTCTGGTGGACACCACTGGGTTCGACCGAGTTG…
	T4gp10_RBP_P3P5_2	K11gp17_T4gp10_E_179/876_BsaI mutation	AGAGGTCTCGGTTCAGCAGATGACACCACGTCTCTCAAGGGAATCAACTGGGTGTATAACAATGGGTCGGCCAATGGTGGCGAGACATCCATCCTGATTACCCGCGAGGGGCCAGTGTTCGCTGTGCCTACCATTTACATCAATGGGGACAGACAGTCTGTTGGTTACCACTACTCTTACGACTCCGGTGATAAGACCATTCACCTAGTTAAGCCGCTAACTGCTGGAGACTTTGTGGAATGTGTTACCTCTGAGGGCGTACTGCCGCTGTCTAATCTTCTGTCGACACCAGACGGGGCCAGTCAGATTGGCACTAAAAGCGGCCTGACTGTGCAAGACTACCTTAACGGCGTGAAGTCCGCTACCATCCTGCGCAACATTGAGCCAGTCATTGATGGA…
	RBP_End_P5P8_1	KP32gp38whole_1/577_bp 37774-37968	AGAGGTCTCGGAGAACCTCATGTTAGACAATTTCAATCAGCCGAAAGGCTCAACCATTGGTGTGCTCAAGGATGGGCGCACTATCCAAGAGGCATTCGACTCATTACCGCGCCTTGAGTCCTTCTCTGGGTCCACGGCAACCGACAAGCTACGCGCAGCCATCACCTTAGGTGTATCTGAGGTCGCCATCGGTCCTGTTGAAGGTAACGGCGGAAGGCCTTATGAGTTCGGGGATGTAGTCATTCCGTATCCTCTGCGTATTGTAGGTTGTGGTTCTCAAGGTATCAACGTTACCAAGGGAACAGTCCTCAAGCGTTCTGCGGGTGCATCCTTCATGTTCCACTTCACGGGCGAGGGACAAGCTCAGCGTCCTATGGGCGGTGGGTTGTTTAACATCAA…
KP32_gp37_B_E::KP32gp38	Start_Anchor_P1P3_1	KP32_bp 33238-33422_KP32gp37A_1/178	AGAGGTCTCTGACTGGCCTGATGAACTCCACAAAGGAGCTTGTGCCAAACGACCCGCTTACCCAACAGCTAATCATGAAAATCTATGAAGCTAATGGTGTCACCATAAAGCAGCAGCCTAGACCCAACTAATTAGGGCACACTATAGGGAGGCCGACTGGTTTCCCTCCTATTCAACTTAAGGAGGTCACCATGGACCAAGATATTAAAACAATCATTCAGTACCCAACAGGAGCCACTGAGTTTGACATCCCGTTTGACTACCTGTCCCGCAAGTTTGTCCGCGTGTCTCTGGTATCGGACGACAACCGCCGACTCTTGCGCAACATCACGGAGTACCGTTACGTGTCGAAGACTCGCGTTAAGATTCTGGTGGACACCACTGGGTTCGACCGAGTTG…
	RBP_P3P7_30	KP32gp38whole_2/577	AGAGGTCTCGGTTCATTAGACAATTTCAATCAGCCGAAAGGCTCAACCATTGGTGTGCTCAAGGATGGGCGCACTATCCAAGAGGCATTCGACTCATTACCGCGCCTTGAGTCCTTCTCTGGGTCCACGGCAACCGACAAGCTACGCGCAGCCATCACCTTAGGTGTATCTGAGGTCGCCATCGGTCCTGTTGAAGGTAACGGCGGAAGGCCTTATGAGTTCGGGGATGTAGTCATTCCGTATCCTCTGCGTATTGTAGGTTGTGGTTCTCAAGGTATCAACGTTACCAAGGGAACAGTCCTCAAGCGTTCTGCGGGTGCATCCTTCATGTTCCACTTCACGGGCGAGGGACAAGCTCAGCGTCCTATGGGCGGTGGGTTGTTTAACATCAACCTGAAT…
	End_P7P8_KP32	KP32 bp 37774-37968 (after gp38)	AGAGGTCTCGGTAATATGTTGTCCCTAGACTTCAATAACGAAGTTATCAAGGCGGCTCCCATTGCGGGTGTCGCTGGGGCCGATGGTGTAGCGAGGCTCTTCTGGGGCCTCTCACTCAACGAGTGGTTCTACGTCGCGGCAATCGCCTACACAGTGGTTCAGATTGGTGCCAAGGTAGTCGATAAAATCATTGACTGGAAGAAAGAGACCAAG
KP32_gp37ΔE	Start_P1P2_KP32	KP32 bp 33238-33422 (before gp37)	AGAGGTCTCTGACTGGCCTGATGAACTCCACAAAGGAGCTTGTGCCAAACGACCCGCTTACCCAACAGCTAATCATGAAAATCTATGAAGCTAATGGTGTCACCATAAAGCAGCAGCCTAGACCCAACTAATTAGGGCACACTATAGGGAGGCCGACTGGTTTCCCTCCTATTCAACTTAAGGAGGTCACCATGGAGACCAAG
	Anchor_T4gp10_P2P5_4	KP32gp37A_T4gp10_1/256	AGAGGTCTCACCATGGACCAAGATATTAAAACAATCATTCAGTACCCAACAGGAGCCACTGAGTTTGACATCCCGTTTGACTACCTGTCCCGCAAGTTTGTCCGCGTGTCTCTGGTATCGGACGACAACCGCCGACTCTTGCGCAACATCACGGAGTACCGTTACGTGTCGAAGACTCGCGTTAAGATTCTGGTGGACACCACTGGGTTCGACCGAGTTGAAATCCGACGGTTCACCTCAGCGTCTGAACGTGTTGTGGACTTCAGTGATGGCTCTGTGCTCCGCGCTAACGACCTAAACGTGTCCCAGCTACAGTCTTCACATATTGCCGAAGAGGCCCGTGACAGTGCGCTTCTGGCCATGCCTGAGGATGATGCTGGTAACCTCGACGCGAGAAAC…
	RBP_P5P7_2	KP32gp38whole_1/577	AGAGGTCTCGGAGAACCTCATGTTAGACAATTTCAATCAGCCGAAAGGCTCAACCATTGGTGTGCTCAAGGATGGGCGCACTATCCAAGAGGCATTCGACTCATTACCGCGCCTTGAGTCCTTCTCTGGGTCCACGGCAACCGACAAGCTACGCGCAGCCATCACCTTAGGTGTATCTGAGGTCGCCATCGGTCCTGTTGAAGGTAACGGCGGAAGGCCTTATGAGTTCGGGGATGTAGTCATTCCGTATCCTCTGCGTATTGTAGGTTGTGGTTCTCAAGGTATCAACGTTACCAAGGGAACAGTCCTCAAGCGTTCTGCGGGTGCATCCTTCATGTTCCACTTCACGGGCGAGGGACAAGCTCAGCGTCCTATGGGCGGTGGGTTGTTTAACATCAA…
	End_P7P8_KP32	KP32 bp 37774-37968 (after gp38)	AGAGGTCTCGGTAATATGTTGTCCCTAGACTTCAATAACGAAGTTATCAAGGCGGCTCCCATTGCGGGTGTCGCTGGGGCCGATGGTGTAGCGAGGCTCTTCTGGGGCCTCTCACTCAACGAGTGGTTCTACGTCGCGGCAATCGCCTACACAGTGGTTCAGATTGGTGCCAAGGTAGTCGATAAAATCATTGACTGGAAGAAAGAGACCAAG
KP32_gp37ΔB_E	Start_P1P2_KP32	KP32 bp 33238-33422 (before gp37)	AGAGGTCTCTGACTGGCCTGATGAACTCCACAAAGGAGCTTGTGCCAAACGACCCGCTTACCCAACAGCTAATCATGAAAATCTATGAAGCTAATGGTGTCACCATAAAGCAGCAGCCTAGACCCAACTAATTAGGGCACACTATAGGGAGGCCGACTGGTTTCCCTCCTATTCAACTTAAGGAGGTCACCATGGAGACCAAG
	Anchor_P2P5_3	KP32gp37A_1/178	AGAGGTCTCACCATGGACCAAGATATTAAAACAATCATTCAGTACCCAACAGGAGCCACTGAGTTTGACATCCCGTTTGACTACCTGTCCCGCAAGTTTGTCCGCGTGTCTCTGGTATCGGACGACAACCGCCGACTCTTGCGCAACATCACGGAGTACCGTTACGTGTCGAAGACTCGCGTTAAGATTCTGGTGGACACCACTGGGTTCGACCGAGTTGAAATCCGACGGTTCACCTCAGCGTCTGAACGTGTTGTGGACTTCAGTGATGGCTCTGTGCTCCGCGCTAACGACCTAAACGTGTCCCAGCTACAGTCTTCACATATTGCCGAAGAGGCCCGTGACAGTGCGCTTCTGGCCATGCCTGAGGATGATGCTGGTAACCTCGACGCGAGAAAC…
	RBP_P5P7_2	KP32gp38whole_1/577	AGAGGTCTCGGAGAACCTCATGTTAGACAATTTCAATCAGCCGAAAGGCTCAACCATTGGTGTGCTCAAGGATGGGCGCACTATCCAAGAGGCATTCGACTCATTACCGCGCCTTGAGTCCTTCTCTGGGTCCACGGCAACCGACAAGCTACGCGCAGCCATCACCTTAGGTGTATCTGAGGTCGCCATCGGTCCTGTTGAAGGTAACGGCGGAAGGCCTTATGAGTTCGGGGATGTAGTCATTCCGTATCCTCTGCGTATTGTAGGTTGTGGTTCTCAAGGTATCAACGTTACCAAGGGAACAGTCCTCAAGCGTTCTGCGGGTGCATCCTTCATGTTCCACTTCACGGGCGAGGGACAAGCTCAGCGTCCTATGGGCGGTGGGTTGTTTAACATCAA…
	End_P7P8_KP32	KP32 bp 37774-37968 (after gp38)	AGAGGTCTCGGTAATATGTTGTCCCTAGACTTCAATAACGAAGTTATCAAGGCGGCTCCCATTGCGGGTGTCGCTGGGGCCGATGGTGTAGCGAGGCTCTTCTGGGGCCTCTCACTCAACGAGTGGTTCTACGTCGCGGCAATCGCCTACACAGTGGTTCAGATTGGTGCCAAGGTAGTCGATAAAATCATTGACTGGAAGAAAGAGACCAAG
KP32_Δgp37	Start_P1P2_KP32	KP32 bp 33238-33422 (before gp37)	AGAGGTCTCTGACTGGCCTGATGAACTCCACAAAGGAGCTTGTGCCAAACGACCCGCTTACCCAACAGCTAATCATGAAAATCTATGAAGCTAATGGTGTCACCATAAAGCAGCAGCCTAGACCCAACTAATTAGGGCACACTATAGGGAGGCCGACTGGTTTCCCTCCTATTCAACTTAAGGAGGTCACCATGGAGACCAAG
	RBP_P2P7_2	KP32gp38whole_1/577	AGAGGTCTCACCATGTTAGACAATTTCAATCAGCCGAAAGGCTCAACCATTGGTGTGCTCAAGGATGGGCGCACTATCCAAGAGGCATTCGACTCATTACCGCGCCTTGAGTCCTTCTCTGGGTCCACGGCAACCGACAAGCTACGCGCAGCCATCACCTTAGGTGTATCTGAGGTCGCCATCGGTCCTGTTGAAGGTAACGGCGGAAGGCCTTATGAGTTCGGGGATGTAGTCATTCCGTATCCTCTGCGTATTGTAGGTTGTGGTTCTCAAGGTATCAACGTTACCAAGGGAACAGTCCTCAAGCGTTCTGCGGGTGCATCCTTCATGTTCCACTTCACGGGCGAGGGACAAGCTCAGCGTCCTATGGGCGGTGGGTTGTTTAACATCAACCTGAAT…
	End_P7P8_KP32	KP32 bp 37774-37968 (after gp38)	AGAGGTCTCGGTAATATGTTGTCCCTAGACTTCAATAACGAAGTTATCAAGGCGGCTCCCATTGCGGGTGTCGCTGGGGCCGATGGTGTAGCGAGGCTCTTCTGGGGCCTCTCACTCAACGAGTGGTTCTACGTCGCGGCAATCGCCTACACAGTGGTTCAGATTGGTGCCAAGGTAGTCGATAAAATCATTGACTGGAAGAAAGAGACCAAG
KP32_gp38ΔB	Start_Anchor_P1P3_1	KP32_bp 33238-33422_KP32gp37A_1/178	AGAGGTCTCTGACTGGCCTGATGAACTCCACAAAGGAGCTTGTGCCAAACGACCCGCTTACCCAACAGCTAATCATGAAAATCTATGAAGCTAATGGTGTCACCATAAAGCAGCAGCCTAGACCCAACTAATTAGGGCACACTATAGGGAGGCCGACTGGTTTCCCTCCTATTCAACTTAAGGAGGTCACCATGGACCAAGATATTAAAACAATCATTCAGTACCCAACAGGAGCCACTGAGTTTGACATCCCGTTTGACTACCTGTCCCGCAAGTTTGTCCGCGTGTCTCTGGTATCGGACGACAACCGCCGACTCTTGCGCAACATCACGGAGTACCGTTACGTGTCGAAGACTCGCGTTAAGATTCTGGTGGACACCACTGGGTTCGACCGAGTTG…
	RBP_P3P5_7	KP32gp37E_257/870	AGAGGTCTCGGTTCATCTGAAGGTACTCACTCATTAGCGTCCATACTGGCAGGCCCTGACGGTGCAAGCCGAATCGGGGCGTCTGGCGGACTTACCGTTCAACAGGCGATTGACCGTATCCTTGAGAGCCATATTATCCTACCACAGTGGTTCGGTGCACGTGGCGACTGGAGCGATACGACAAATACTGGTACCGATGATACAGCAGCCTTCGAGGCGGCTATCGAGATGGCTGTCACCTTGAATTATACAGAGGTGTATGTCCCGGCTGGTTCCTACTTGATTACACGTGAGTTAAACCTCAACGGTGGAAATCGGAATACCCGCCTAGGTGCTCGCATCCGTGGAGCAGGTTGGGCCTCCTCAGTGCTGGTCTTTAAGGCACCAGCGCCAGAGACT…
	RBP_P5P7_2	KP32gp38whole_1/577	AGAGGTCTCGGAGAACCTCATGTTAGACAATTTCAATCAGCCGAAAGGCTCAACCATTGGTGTGCTCAAGGATGGGCGCACTATCCAAGAGGCATTCGACTCATTACCGCGCCTTGAGTCCTTCTCTGGGTCCACGGCAACCGACAAGCTACGCGCAGCCATCACCTTAGGTGTATCTGAGGTCGCCATCGGTCCTGTTGAAGGTAACGGCGGAAGGCCTTATGAGTTCGGGGATGTAGTCATTCCGTATCCTCTGCGTATTGTAGGTTGTGGTTCTCAAGGTATCAACGTTACCAAGGGAACAGTCCTCAAGCGTTCTGCGGGTGCATCCTTCATGTTCCACTTCACGGGCGAGGGACAAGCTCAGCGTCCTATGGGCGGTGGGTTGTTTAACATCAA…
	End_P7P8_KP32	KP32 bp 37774-37968 (after gp38)	AGAGGTCTCGGTAATATGTTGTCCCTAGACTTCAATAACGAAGTTATCAAGGCGGCTCCCATTGCGGGTGTCGCTGGGGCCGATGGTGTAGCGAGGCTCTTCTGGGGCCTCTCACTCAACGAGTGGTTCTACGTCGCGGCAATCGCCTACACAGTGGTTCAGATTGGTGCCAAGGTAGTCGATAAAATCATTGACTGGAAGAAAGAGACCAAG
KP32_gp37_B_E::K1Fgp17_E1	Start_Anchor_P1P3_1	KP32_bp 33238-33422_KP32gp37A_1/178	AGAGGTCTCTGACTGGCCTGATGAACTCCACAAAGGAGCTTGTGCCAAACGACCCGCTTACCCAACAGCTAATCATGAAAATCTATGAAGCTAATGGTGTCACCATAAAGCAGCAGCCTAGACCCAACTAATTAGGGCACACTATAGGGAGGCCGACTGGTTTCCCTCCTATTCAACTTAAGGAGGTCACCATGGACCAAGATATTAAAACAATCATTCAGTACCCAACAGGAGCCACTGAGTTTGACATCCCGTTTGACTACCTGTCCCGCAAGTTTGTCCGCGTGTCTCTGGTATCGGACGACAACCGCCGACTCTTGCGCAACATCACGGAGTACCGTTACGTGTCGAAGACTCGCGTTAAGATTCTGGTGGACACCACTGGGTTCGACCGAGTTG…
	RBP_P3P5_9	K1F_gp17_147/1065	AGAGGTCTCGGTTCAGGTCTAATTGGTTATATGACCCGTCGCTCCTTCGAGAAAGGCTACAACGTTACAACATGGAGCGAGGTCCTGCTATGGGAAGAGGATGGTGATTATTACCGCTGGGATGGTACGCTTCCAAAGAACGTTCCTGCTGGTTCAACTCCTGAAACTTCCGGTGGGATTGGATTAGGTGCGTGGGTTAGTGTTGGTGATGCTGCTTTAAGAAGTCAGATTTCAAACCCGGAAGGGGCAATACTCTACCCTGAATTACATAGAGCACGCTGGCTTGATGAAAAAGATGCTCGTGGTTGGGGTGCTAAAGGGGATGGTGTCACTGATGATACAGCAGCGTTAACGAGCGCATTAAACGACACACCGGTTGGACAAAAGATTAATGGCAAT…
	RBP_End_P5P8_1	KP32 bp 37774-37968 (after gp38)	AGAGGTCTCGGTAATATGTTGTCCCTAGACTTCAATAACGAAGTTATCAAGGCGGCTCCCATTGCGGGTGTCGCTGGGGCCGATGGTGTAGCGAGGCTCTTCTGGGGCCTCTCACTCAACGAGTGGTTCTACGTCGCGGCAATCGCCTACACAGTGGTTCAGATTGGTGCCAAGGTAGTCGATAAAATCATTGACTGGAAGAAAGAGACCAAG
*E1: aa 147-1065; E2: aa 246-1065
KP32_gp37_B_E::K1Fgp17_E2	Start_Anchor_P1P3_1	KP32_bp 33238-33422_KP32gp37A_1/178	AGAGGTCTCTGACTGGCCTGATGAACTCCACAAAGGAGCTTGTGCCAAACGACCCGCTTACCCAACAGCTAATCATGAAAATCTATGAAGCTAATGGTGTCACCATAAAGCAGCAGCCTAGACCCAACTAATTAGGGCACACTATAGGGAGGCCGACTGGTTTCCCTCCTATTCAACTTAAGGAGGTCACCATGGACCAAGATATTAAAACAATCATTCAGTACCCAACAGGAGCCACTGAGTTTGACATCCCGTTTGACTACCTGTCCCGCAAGTTTGTCCGCGTGTCTCTGGTATCGGACGACAACCGCCGACTCTTGCGCAACATCACGGAGTACCGTTACGTGTCGAAGACTCGCGTTAAGATTCTGGTGGACACCACTGGGTTCGACCGAGTTG…
	RBP_P3P5_10	K1F_gp17_246/1065	AGAGGTCTCGGTTCAGCTAAAGGGGATGGTGTCACTGATGATACAGCAGCGTTAACGAGCGCATTAAACGACACACCGGTTGGACAAAAGATTAATGGCAATGGGAAGACATATAAGGTCACATCCCTGCCTGACATTAGTCGCTTCATCAACACTCGTTTCGTTTATGAGCGCATTCCCGGACAACCTCTTTATTATGCCTCTGAAGAATTTGTTCAGGGTGAGCTATTCAAAATAACGGACACCCCTTATTACAATGCGTGGCCTCAGGATAAAGCGTTCGTATATGAGAATGTGATATATGCACCTTACATGGGTAGCGATCGTCATGGTGTTAGTCGTCTGCATGTATCATGGGTTAAGTCTGGTGATGATGGTCAAACATGGTCTACTCCAGAG…
	RBP_End_P5P8_1	KP32gp38whole_1/577_bp 37774-37968	AGAGGTCTCGGAGAACCTCATGTTAGACAATTTCAATCAGCCGAAAGGCTCAACCATTGGTGTGCTCAAGGATGGGCGCACTATCCAAGAGGCATTCGACTCATTACCGCGCCTTGAGTCCTTCTCTGGGTCCACGGCAACCGACAAGCTACGCGCAGCCATCACCTTAGGTGTATCTGAGGTCGCCATCGGTCCTGTTGAAGGTAACGGCGGAAGGCCTTATGAGTTCGGGGATGTAGTCATTCCGTATCCTCTGCGTATTGTAGGTTGTGGTTCTCAAGGTATCAACGTTACCAAGGGAACAGTCCTCAAGCGTTCTGCGGGTGCATCCTTCATGTTCCACTTCACGGGCGAGGGACAAGCTCAGCGTCCTATGGGCGGTGGGTTGTTTAACATCAA…
*E1: aa 147-1065; E2: aa 246-1065
KP32_gp38E::K1Fgp17E1	Start_P1P2_KP32	KP32 bp 33238-33422 (before gp37)	AGAGGTCTCTGACTGGCCTGATGAACTCCACAAAGGAGCTTGTGCCAAACGACCCGCTTACCCAACAGCTAATCATGAAAATCTATGAAGCTAATGGTGTCACCATAAAGCAGCAGCCTAGACCCAACTAATTAGGGCACACTATAGGGAGGCCGACTGGTTTCCCTCCTATTCAACTTAAGGAGGTCACCATGGAGACCAAG
	RBP_P2P5_2	KP32gp37AE_2/869	AGAGGTCTCACCATGGACCAAGATATTAAAACAATCATTCAGTACCCAACAGGAGCCACTGAGTTTGACATCCCGTTTGACTACCTGTCCCGCAAGTTTGTCCGCGTGTCTCTGGTATCGGACGACAACCGCCGACTCTTGCGCAACATCACGGAGTACCGTTACGTGTCGAAGACTCGCGTTAAGATTCTGGTGGACACCACTGGGTTCGACCGAGTTGAAATCCGACGGTTCACCTCAGCGTCTGAACGTGTTGTGGACTTCAGTGATGGCTCTGTGCTCCGCGCTAACGACCTAAACGTGTCCCAGCTACAGTCTTCACATATTGCCGAAGAGGCCCGTGACAGTGCGCTTCTGGCCATGCCTGAGGATGATGCTGGTAACCTCGACGCGAGAAAC…
	CP_P5P6_2	KP32CP_1/35	AGAGGTCTCGGAGAACCTCATGTTAGACAATTTCAATCAGCCGAAAGGCTCAACCATTGGTGTGCTCAAGGATGGGCGCACTATCCAAGAGGCATTCGACTCATTACCGCGCCTTGAGTCCTTCAGCGGAGAGACCAAG
	RBP_P6P7_7	K1F_gp17_147/1065	AGAGGTCTCAGCGGAGGTCTAATTGGTTATATGACCCGTCGCTCCTTCGAGAAAGGCTACAACGTTACAACATGGAGCGAGGTCCTGCTATGGGAAGAGGATGGTGATTATTACCGCTGGGATGGTACGCTTCCAAAGAACGTTCCTGCTGGTTCAACTCCTGAAACTTCCGGTGGGATTGGATTAGGTGCGTGGGTTAGTGTTGGTGATGCTGCTTTAAGAAGTCAGATTTCAAACCCGGAAGGGGCAATACTCTACCCTGAATTACATAGAGCACGCTGGCTTGATGAAAAAGATGCTCGTGGTTGGGGTGCTAAAGGGGATGGTGTCACTGATGATACAGCAGCGTTAACGAGCGCATTAAACGACACACCGGTTGGACAAAAGATTAATGGCAAT…
	End_P7P8_KP32	KP32 bp 37774-37968 (after gp38)	AGAGGTCTCGGTAATATGTTGTCCCTAGACTTCAATAACGAAGTTATCAAGGCGGCTCCCATTGCGGGTGTCGCTGGGGCCGATGGTGTAGCGAGGCTCTTCTGGGGCCTCTCACTCAACGAGTGGTTCTACGTCGCGGCAATCGCCTACACAGTGGTTCAGATTGGTGCCAAGGTAGTCGATAAAATCATTGACTGGAAGAAAGAGACCAAG
*E1: aa 147-1065; E2: aa 246-1065
K1F_gp17E1::KP32gp37B_E	Start_P1P2_K1F	K1F bp 32482-32663 (before gp17)	AGAGGTCTCTGACTGCATGACCGGGATGTATAATACGTTCCGTGAACTGGTTCCGAACGACCCCATTACCCAGAAGCTGTTGCTTGGAATGTTTGAGGAGCAAGGCATCCACATCAAGGACTAAACTATCACTATAGGAAACGGGAGGCGCTACCATAGGTATCCGCTTAAATCACAAAGGAGGCACCATGGAGACCAAG
	Anchor_P2P3_15	K1FAnchor_1/146, BsaI removed	AGAGGTCTCACCATGTCTCACAGTTCAAGAACCTCAAGTCTCCCCATAGGCCCTCTTTAAGTCCAGACCAAAGGCCCTACCCCAGTCTATCATAAGGTTGGACCGATGGTCAAGACGTCAGGTCAACGATAGGTCTAGGCTATGGCTTAGGGAAGGACGATGGTTCAGAGACCAAG
	RBP_P3P7_33	KP32gp37_179/870	AGAGGTCTCGGTTCAGCCAACGGAACGACTTACCTTAAGAACATCGTAATGGTGTACAACCAAGGGTCTGCCAATGGTGGGGAAACCGCTATCGTCCTCGACAGGACCGACGAAGTGTTTGCTGTCCCAGTGATTTACATCAACGGTGACAGACAAGAAGTTGGCTTCCAGTTCTCCTACGACAACACCACCAAGACGATTACCCTCGTTAAGCCGCTGCAACGTGGCGACTTTGTTGTAATGCTTACCTCTGAAGGTACTCACTCATTAGCGTCCATACTGGCAGGCCCTGACGGTGCAAGCCGAATCGGGGCGTCTGGCGGACTTACCGTTCAACAGGCGATTGACCGTATCCTTGAGAGCCATATTATCCTACCACAGTGGTTCGGTGCACGTGGC…
	End_P7P8_K1F	K1F bp 35856-35997 (after gp17)	AGAGGTCTCGGTAATTAAACAAAACCATTTTGCCATTAAGTTGGTGGGGTAGATGTTAGAAGGTTGTGGAGGTAGAGGCTAACTACACGCTAACCAACGTATGTAACAACTTTGGGTCACGGACGACCCGCTTTAAACTGGAGGTTTTATGATTGAGAAG AAAGAGACCAAG
*E1: aa 147-1065; E2: aa 246-1065
K1F_gp17E2::KP32gp37B_E	Start_P1P2_K1F	K1F bp 32482-32663 (before gp17)	AGAGGTCTCTGACTGCATGACCGGGATGTATAATACGTTCCGTGAACTGGTTCCGAACGACCCCATTACCCAGAAGCTGTTGCTTGGAATGTTTGAGGAGCAAGGCATCCACATCAAGGACTAAACTATCACTATAGGAAACGGGAGGCGCTACCATAGGTATCCGCTTAAATCACAAAGGAGGCACCATGGAGACCAAG
	Anchor_P2P3_16	K1FAnchor_1/245, BsaI removed	AGAGGTCTCACCATGTCCACGATTACACAATTCCCTTCAGGAAACACTCAGTACAGGATTGAGTTCGACTACCTAGCCAGAACGTTTGTTGTTGTTACGCTGGTGAATAGCTCTAACCCTACCCTGAACCGTGTACTGGAAGTTGGTCGAGATTACCGATTCCTTAACCCAACGATGATTGAGATGTTGGTGGACCAATCAGGTTTCGACATCGTTCGTATTCACCGTCAGACTGGGACTGACTTAGTGGTAGACTTCAGGAATGGCTCAGTGTTGACAGCTAGTGACCTGACCACTGCAGAGCTTCAGGCTATCCATATTGCAGAAGAAGGTCGTGACCAAACGGTTGACTTAGCGAAGGAATATGCCGATGCTGCTGGTAGCTCTGCTGGCAACGCT…
	RBP_P3P7_33	KP32gp37_179/870	AGAGGTCTCGGTTCAGCCAACGGAACGACTTACCTTAAGAACATCGTAATGGTGTACAACCAAGGGTCTGCCAATGGTGGGGAAACCGCTATCGTCCTCGACAGGACCGACGAAGTGTTTGCTGTCCCAGTGATTTACATCAACGGTGACAGACAAGAAGTTGGCTTCCAGTTCTCCTACGACAACACCACCAAGACGATTACCCTCGTTAAGCCGCTGCAACGTGGCGACTTTGTTGTAATGCTTACCTCTGAAGGTACTCACTCATTAGCGTCCATACTGGCAGGCCCTGACGGTGCAAGCCGAATCGGGGCGTCTGGCGGACTTACCGTTCAACAGGCGATTGACCGTATCCTTGAGAGCCATATTATCCTACCACAGTGGTTCGGTGCACGTGGC…
	End_P7P8_K1F	K1F bp 35856-35997 (after gp17)	AGAGGTCTCGGTAATTAAACAAAACCATTTTGCCATTAAGTTGGTGGGGTAGATGTTAGAAGGTTGTGGAGGTAGAGGCTAACTACACGCTAACCAACGTATGTAACAACTTTGGGTCACGGACGACCCGCTTTAAACTGGAGGTTTTATGATTGAGAAG AAAGAGACCAAG
*E1: aa 147-1065; E2: aa 246-1065
K1F_gp17E1::KP32gp37B_E_KP32gp38	Start_P1P2_K1F	K1F bp 32482-32663 (before gp17)	AGAGGTCTCTGACTGCATGACCGGGATGTATAATACGTTCCGTGAACTGGTTCCGAACGACCCCATTACCCAGAAGCTGTTGCTTGGAATGTTTGAGGAGCAAGGCATCCACATCAAGGACTAAACTATCACTATAGGAAACGGGAGGCGCTACCATAGGTATCCGCTTAAATCACAAAGGAGGCACCATGGAGACCAAG
	Anchor_P2P3_15	K1FAnchor_1/146, BsaI removed	AGAGGTCTCACCATGTCTCACAGTTCAAGAACCTCAAGTCTCCCCATAGGCCCTCTTTAAGTCCAGACCAAAGGCCCTACCCCAGTCTATCATAAGGTTGGACCGATGGTCAAGACGTCAGGTCAACGATAGGTCTAGGCTATGGCTTAGGGAAGGACGATGGTTCAGAGACCAAG
	T4gp10_RPB_P3P5_8	KP32gp37 T4gp10_E_179/870	AGAGGTCTCGGTTCAGCCAACGGAACGACTTACCTTAAGAACATCGTAATGGTGTACAACCAAGGGTCTGCCAATGGTGGGGAAACCGCTATCGTCCTCGACAGGACCGACGAAGTGTTTGCTGTCCCAGTGATTTACATCAACGGTGACAGACAAGAAGTTGGCTTCCAGTTCTCCTACGACAACACCACCAAGACGATTACCCTCGTTAAGCCGCTGCAACGTGGCGACTTTGTTGTAATGCTTACCTCTGAAGGTACTCACTCATTAGCGTCCATACTGGCAGGCCCTGACGGTGCAAGCCGAATCGGGGCGTCTGGCGGACTTACCGTTCAACAGGCGATTGACCGTATCCTTGAGAGCCATATTATCCTACCACAGTGGTTCGGTGCACGTGGC…
	RBP_P5P7_2	KP32gp38whole_1/577	AGAGGTCTCGGAGAACCTCATGTTAGACAATTTCAATCAGCCGAAAGGCTCAACCATTGGTGTGCTCAAGGATGGGCGCACTATCCAAGAGGCATTCGACTCATTACCGCGCCTTGAGTCCTTCTCTGGGTCCACGGCAACCGACAAGCTACGCGCAGCCATCACCTTAGGTGTATCTGAGGTCGCCATCGGTCCTGTTGAAGGTAACGGCGGAAGGCCTTATGAGTTCGGGGATGTAGTCATTCCGTATCCTCTGCGTATTGTAGGTTGTGGTTCTCAAGGTATCAACGTTACCAAGGGAACAGTCCTCAAGCGTTCTGCGGGTGCATCCTTCATGTTCCACTTCACGGGCGAGGGACAAGCTCAGCGTCCTATGGGCGGTGGGTTGTTTAACATCAA…
	End_P7P8_K1F	K1F bp 35856-35997 (after gp17)	AGAGGTCTCGGTAATTAAACAAAACCATTTTGCCATTAAGTTGGTGGGGTAGATGTTAGAAGGTTGTGGAGGTAGAGGCTAACTACACGCTAACCAACGTATGTAACAACTTTGGGTCACGGACGACCCGCTTTAAACTGGAGGTTTTATGATTGAGAAG AAAGAGACCAAG
*E1: aa 147-1065; E2: aa 246-1065
K1F_gp17E2::KP32gp37B_E_KP32gp38	Start_P1P2_K1F	K1F bp 32482-32663 (before gp17)	AGAGGTCTCTGACTGCATGACCGGGATGTATAATACGTTCCGTGAACTGGTTCCGAACGACCCCATTACCCAGAAGCTGTTGCTTGGAATGTTTGAGGAGCAAGGCATCCACATCAAGGACTAAACTATCACTATAGGAAACGGGAGGCGCTACCATAGGTATCCGCTTAAATCACAAAGGAGGCACCATGGAGACCAAG
	Anchor_P2P3_16	K1FAnchor_1/245, BsaI removed	AGAGGTCTCACCATGTCCACGATTACACAATTCCCTTCAGGAAACACTCAGTACAGGATTGAGTTCGACTACCTAGCCAGAACGTTTGTTGTTGTTACGCTGGTGAATAGCTCTAACCCTACCCTGAACCGTGTACTGGAAGTTGGTCGAGATTACCGATTCCTTAACCCAACGATGATTGAGATGTTGGTGGACCAATCAGGTTTCGACATCGTTCGTATTCACCGTCAGACTGGGACTGACTTAGTGGTAGACTTCAGGAATGGCTCAGTGTTGACAGCTAGTGACCTGACCACTGCAGAGCTTCAGGCTATCCATATTGCAGAAGAAGGTCGTGACCAAACGGTTGACTTAGCGAAGGAATATGCCGATGCTGCTGGTAGCTCTGCTGGCAACGCT…
	T4gp10_RPB_P3P5_8	KP32gp37 T4gp10_E_179/870	AGAGGTCTCGGTTCAGCCAACGGAACGACTTACCTTAAGAACATCGTAATGGTGTACAACCAAGGGTCTGCCAATGGTGGGGAAACCGCTATCGTCCTCGACAGGACCGACGAAGTGTTTGCTGTCCCAGTGATTTACATCAACGGTGACAGACAAGAAGTTGGCTTCCAGTTCTCCTACGACAACACCACCAAGACGATTACCCTCGTTAAGCCGCTGCAACGTGGCGACTTTGTTGTAATGCTTACCTCTGAAGGTACTCACTCATTAGCGTCCATACTGGCAGGCCCTGACGGTGCAAGCCGAATCGGGGCGTCTGGCGGACTTACCGTTCAACAGGCGATTGACCGTATCCTTGAGAGCCATATTATCCTACCACAGTGGTTCGGTGCACGTGGC…
	RBP_P5P7_2	KP32gp38whole_1/577	AGAGGTCTCGGAGAACCTCATGTTAGACAATTTCAATCAGCCGAAAGGCTCAACCATTGGTGTGCTCAAGGATGGGCGCACTATCCAAGAGGCATTCGACTCATTACCGCGCCTTGAGTCCTTCTCTGGGTCCACGGCAACCGACAAGCTACGCGCAGCCATCACCTTAGGTGTATCTGAGGTCGCCATCGGTCCTGTTGAAGGTAACGGCGGAAGGCCTTATGAGTTCGGGGATGTAGTCATTCCGTATCCTCTGCGTATTGTAGGTTGTGGTTCTCAAGGTATCAACGTTACCAAGGGAACAGTCCTCAAGCGTTCTGCGGGTGCATCCTTCATGTTCCACTTCACGGGCGAGGGACAAGCTCAGCGTCCTATGGGCGGTGGGTTGTTTAACATCAA…
	End_P7P8_K1F	K1F bp 35856-35997 (after gp17)	AGAGGTCTCGGTAATTAAACAAAACCATTTTGCCATTAAGTTGGTGGGGTAGATGTTAGAAGGTTGTGGAGGTAGAGGCTAACTACACGCTAACCAACGTATGTAACAACTTTGGGTCACGGACGACCCGCTTTAAACTGGAGGTTTTATGATTGAGAAG AAAGAGACCAAG
*E1: aa 147-1065; E2: aa 246-1065
KP32_gp37_E::K1Fgp17_E1	Start_P1P2_KP32	KP32 bp 33238-33422 (before gp37)	AGAGGTCTCTGACTGGCCTGATGAACTCCACAAAGGAGCTTGTGCCAAACGACCCGCTTACCCAACAGCTAATCATGAAAATCTATGAAGCTAATGGTGTCACCATAAAGCAGCAGCCTAGACCCAACTAATTAGGGCACACTATAGGGAGGCCGACTGGTTTCCCTCCTATTCAACTTAAGGAGGTCACCATGGAGACCAAG
	Anchor_P2P4_2	KP32gp37A_2/256	AGAGGTCTCACCATGGACCAAGATATTAAAACAATCATTCAGTACCCAACAGGAGCCACTGAGTTTGACATCCCGTTTGACTACCTGTCCCGCAAGTTTGTCCGCGTGTCTCTGGTATCGGACGACAACCGCCGACTCTTGCGCAACATCACGGAGTACCGTTACGTGTCGAAGACTCGCGTTAAGATTCTGGTGGACACCACTGGGTTCGACCGAGTTGAAATCCGACGGTTCACCTCAGCGTCTGAACGTGTTGTGGACTTCAGTGATGGCTCTGTGCTCCGCGCTAACGACCTAAACGTGTCCCAGCTACAGTCTTCACATATTGCCGAAGAGGCCCGTGACAGTGCGCTTCTGGCCATGCCTGAGGATGATGCTGGTAACCTCGACGCGAGAAAC…
	RBP_P4P5_6	K1F_gp17_147/1065, sBVM	AGAGGTCTCTCTGAAGGTCTAATTGGTTATATGACCCGTCGCTCCTTCGAGAAAGGCTACAACGTTACAACATGGAGCGAGGTCCTGCTATGGGAAGAGGATGGTGATTATTACCGCTGGGATGGTACGCTTCCAAAGAACGTTCCTGCTGGTTCAACTCCTGAAACTTCCGGTGGGATTGGATTAGGTGCGTGGGTTAGTGTTGGTGATGCTGCTTTAAGAAGTCAGATTTCAAACCCGGAAGGGGCAATACTCTACCCTGAATTACATAGAGCACGCTGGCTTGATGAAAAAGATGCTCGTGGTTGGGGTGCTAAAGGGGATGGTGTCACTGATGATACAGCAGCGTTAACGAGCGCATTAAACGACACACCGGTTGGACAAAAGATTAATGGCAAT…
	RBP_End_P5P8_1	KP32gp38whole_1/577_bp 37774-37968	AGAGGTCTCGGAGAACCTCATGTTAGACAATTTCAATCAGCCGAAAGGCTCAACCATTGGTGTGCTCAAGGATGGGCGCACTATCCAAGAGGCATTCGACTCATTACCGCGCCTTGAGTCCTTCTCTGGGTCCACGGCAACCGACAAGCTACGCGCAGCCATCACCTTAGGTGTATCTGAGGTCGCCATCGGTCCTGTTGAAGGTAACGGCGGAAGGCCTTATGAGTTCGGGGATGTAGTCATTCCGTATCCTCTGCGTATTGTAGGTTGTGGTTCTCAAGGTATCAACGTTACCAAGGGAACAGTCCTCAAGCGTTCTGCGGGTGCATCCTTCATGTTCCACTTCACGGGCGAGGGACAAGCTCAGCGTCCTATGGGCGGTGGGTTGTTTAACATCAA…
*E1: aa 147-1065; E2: aa 246-1065
KP32_gp37_E::K1Fgp17_E2	Start_P1P2_KP32	KP32 bp 33238-33422 (before gp37)	AGAGGTCTCTGACTGGCCTGATGAACTCCACAAAGGAGCTTGTGCCAAACGACCCGCTTACCCAACAGCTAATCATGAAAATCTATGAAGCTAATGGTGTCACCATAAAGCAGCAGCCTAGACCCAACTAATTAGGGCACACTATAGGGAGGCCGACTGGTTTCCCTCCTATTCAACTTAAGGAGGTCACCATGGAGACCAAG
	Anchor_P2P4_2	KP32gp37A_2/256	AGAGGTCTCACCATGGACCAAGATATTAAAACAATCATTCAGTACCCAACAGGAGCCACTGAGTTTGACATCCCGTTTGACTACCTGTCCCGCAAGTTTGTCCGCGTGTCTCTGGTATCGGACGACAACCGCCGACTCTTGCGCAACATCACGGAGTACCGTTACGTGTCGAAGACTCGCGTTAAGATTCTGGTGGACACCACTGGGTTCGACCGAGTTGAAATCCGACGGTTCACCTCAGCGTCTGAACGTGTTGTGGACTTCAGTGATGGCTCTGTGCTCCGCGCTAACGACCTAAACGTGTCCCAGCTACAGTCTTCACATATTGCCGAAGAGGCCCGTGACAGTGCGCTTCTGGCCATGCCTGAGGATGATGCTGGTAACCTCGACGCGAGAAAC…
	RBP_P4P5_7	K1F_gp17_246/1065	AGAGGTCTCTCTGAAGCTAAAGGGGATGGTGTCACTGATGATACAGCAGCGTTAACGAGCGCATTAAACGACACACCGGTTGGACAAAAGATTAATGGCAATGGGAAGACATATAAGGTCACATCCCTGCCTGACATTAGTCGCTTCATCAACACTCGTTTCGTTTATGAGCGCATTCCCGGACAACCTCTTTATTATGCCTCTGAAGAATTTGTTCAGGGTGAGCTATTCAAAATAACGGACACCCCTTATTACAATGCGTGGCCTCAGGATAAAGCGTTCGTATATGAGAATGTGATATATGCACCTTACATGGGTAGCGATCGTCATGGTGTTAGTCGTCTGCATGTATCATGGGTTAAGTCTGGTGATGATGGTCAAACATGGTCTACTCCAGAG…
	RBP_End_P5P8_1	KP32gp38whole_1/577_bp 37774-37968	AGAGGTCTCGGAGAACCTCATGTTAGACAATTTCAATCAGCCGAAAGGCTCAACCATTGGTGTGCTCAAGGATGGGCGCACTATCCAAGAGGCATTCGACTCATTACCGCGCCTTGAGTCCTTCTCTGGGTCCACGGCAACCGACAAGCTACGCGCAGCCATCACCTTAGGTGTATCTGAGGTCGCCATCGGTCCTGTTGAAGGTAACGGCGGAAGGCCTTATGAGTTCGGGGATGTAGTCATTCCGTATCCTCTGCGTATTGTAGGTTGTGGTTCTCAAGGTATCAACGTTACCAAGGGAACAGTCCTCAAGCGTTCTGCGGGTGCATCCTTCATGTTCCACTTCACGGGCGAGGGACAAGCTCAGCGTCCTATGGGCGGTGGGTTGTTTAACATCAA…
*E1: aa 147-1065; E2: aa 246-1065
K1F_gp17E2::KP32gp38	Start_P1P2_K1F	K1F bp 32482-32663 (before gp17)	AGAGGTCTCTGACTGCATGACCGGGATGTATAATACGTTCCGTGAACTGGTTCCGAACGACCCCATTACCCAGAAGCTGTTGCTTGGAATGTTTGAGGAGCAAGGCATCCACATCAAGGACTAAACTATCACTATAGGAAACGGGAGGCGCTACCATAGGTATCCGCTTAAATCACAAAGGAGGCACCATGGAGACCAAG
	Anchor_P2P3_16	K1FAnchor_1/245, BsaI removed	AGAGGTCTCACCATGTCCACGATTACACAATTCCCTTCAGGAAACACTCAGTACAGGATTGAGTTCGACTACCTAGCCAGAACGTTTGTTGTTGTTACGCTGGTGAATAGCTCTAACCCTACCCTGAACCGTGTACTGGAAGTTGGTCGAGATTACCGATTCCTTAACCCAACGATGATTGAGATGTTGGTGGACCAATCAGGTTTCGACATCGTTCGTATTCACCGTCAGACTGGGACTGACTTAGTGGTAGACTTCAGGAATGGCTCAGTGTTGACAGCTAGTGACCTGACCACTGCAGAGCTTCAGGCTATCCATATTGCAGAAGAAGGTCGTGACCAAACGGTTGACTTAGCGAAGGAATATGCCGATGCTGCTGGTAGCTCTGCTGGCAACGCT…
	RBP_P3P7_30	KP32gp38whole_2/577	AGAGGTCTCGGTTCATTAGACAATTTCAATCAGCCGAAAGGCTCAACCATTGGTGTGCTCAAGGATGGGCGCACTATCCAAGAGGCATTCGACTCATTACCGCGCCTTGAGTCCTTCTCTGGGTCCACGGCAACCGACAAGCTACGCGCAGCCATCACCTTAGGTGTATCTGAGGTCGCCATCGGTCCTGTTGAAGGTAACGGCGGAAGGCCTTATGAGTTCGGGGATGTAGTCATTCCGTATCCTCTGCGTATTGTAGGTTGTGGTTCTCAAGGTATCAACGTTACCAAGGGAACAGTCCTCAAGCGTTCTGCGGGTGCATCCTTCATGTTCCACTTCACGGGCGAGGGACAAGCTCAGCGTCCTATGGGCGGTGGGTTGTTTAACATCAACCTGAAT…
	End_P7P8_K1F	K1F bp 35856-35997 (after gp17)	AGAGGTCTCGGTAATTAAACAAAACCATTTTGCCATTAAGTTGGTGGGGTAGATGTTAGAAGGTTGTGGAGGTAGAGGCTAACTACACGCTAACCAACGTATGTAACAACTTTGGGTCACGGACGACCCGCTTTAAACTGGAGGTTTTATGATTGAGAAG AAAGAGACCAAG
*E1: aa 147-1065; E2: aa 246-1065

## Sheet: Table S4
Table S4. Primers used for amplification of the KP32 and K1F genome fragments (F1-F5). The expected length, amplified with the respective primer pair, is shown.*primers for F4 for KP32 and F5 for K1F were used to amplify the RBP gene cluster created with VersaTile, thus the length differs depending on the engineered phage. Composition and sequence of tiles used for each RBP gene cluster can be fo…
	Fragment	Primer name	Primer sequence	Expected length (nt)
	KP32_F1	KP32 scaf 2 FOR	CTCACAGTTTAAACTTTTGGTTATCCCCC	11015
		KP32scaf 11017 REV	GAAGGATAGCGCCCACAAGCCTAACAG
	KP32_F2	KP32 scaf 10899 FOR	CAATTACGTTTCCCTGTTGTCGCTTG	10803
		KP32 scaf 21702 REV	GCTCACCTTGCATGTTAGCCATGTTG
	KP32_F3	KP32 scaf 21566 FOR	GACCCCAGCGCAACTGTAAG	11911
		KP32 scaf 33356 REV	GTTGGGTCTAGGCTGCTGCTTTATGGTG
	KP32_F4	KP32 scaf 33250 FOR	GAACTCCACAAAGGAGCTTGTGCCAAA	4709
		KP32 scaf 37960 REV	GTCAATGATTTTATCGACTACCTTGGC
	KP32_F5	KP32scaf 37771 FOR	GGAGGTAATATGTTGTCCCTAGACTTC	3505
		KP32 scaf 156 REV	GGGACACAGAGACATCAACATATA
	K1F_F1	K1F 35866 FOR	CATTTTGCCATTAAGTTGGTGGGGTAGATG	9650
		K1F 5816 REV	CGAAGTATTTCTCTTGGTTGACCATAGAG
	K1F_F2	K1F 5627 FOR	CACTACTGGAGATTTAACCGTATGTATCAG	9884
		K1F 15510 REV	CTGGAAGTGTCGGACTATATCATCAGTC
	K1F_F3	K1F 15354FOR	GTATTCAATGTGTCGTTCTCAGCCGC	10687
		K1F 25983 REV	CTTAGGTTGGCGTCAGAGTAATTCATCTG
	K1F_F4	K1F 25821 FOR	GTATGTGCGAGCCAGTAAGTATCGGTCTAG	6828
		K1F 32648 REV	GTGATTTAAGCGGAGACCTATGGTAGC
	K1F_F5	K1F 32494 FOR	CGGGATGTATAATACGTTCCGTGAACT	3504
		K1F_35997 REV	CTCAATCATAAAACCTCCAGTTTAAAGCGGGTC

## Sheet: Table S5
Table S5. Components for the preparation of 5X ISO buffer and the Gibson master mix (Gibson et al., 2009) for the assembly of the genomes of the engineered phages.
	5x ISO buffer
	Components	Volume
	1M Tris-HCl pH 7.5 (Across organics)	3 mL
	2 M MgCl2 (Carl Roth)	150 µL
	100 mM dGTP (Biotechrabbit)	60 µL
	100 mM dATP (Biotechrabbit)	60 µL
	100 mM dTTP (Biotechrabbit)	60 µL
	100 mM dCTP (Biotechrabbit)	60 µL
	1 m DTT (Dithiothreitol, Carl Roth)	300 µL
	PEG8000 (Polyethylene Glycol 8000, Promega)	1.5 g
	100 mM NAD (β-Nicotinamide adenine dinucleotide hydrate, VWR)	300 µL
	Ultrapure water	variable
	Total volume	6 mL
	Gibson master mix
	Components	Volume
	5X ISO buffer	40 µL
	T5 exonuclease (10U/µL, NEB)	0.4 µL
	Phusion polymerase (2U/µL, NEB)	2.5 µL
	Taq ligase (40U/µL, NEB)	20 µL
	Ultrapure water	87.1 µL
	Total volume	150 µL

## Sheet: Figure S1
Figure S1. 3D structure of endosialidase from bacteriophage K1F: (A) crystal structure encompassing amino acid residues 245–910 (PDB ID: 1V0E; Stummeyer et al., 2005), and (B) trimeric full-length protein structure predicted using AlphaFold3 (Abramson et al., 2024). Two delineation points selected for phage engineering are located at the start and end of the central region, highlighted in lime.
A							B
